# Supplementary material
Source: publisher site journal article supplement (https://www.dovepress.com/get_supplementary_file.php?f=316158.docx)
Supplement: Supplementary file 1 [file get_supplementary_file.php]

| Supplementary Table 1. The OR for having NDs in diabetic individuals who used metformin | | | |
| --- | --- | --- | --- |
|  | OR | (95% CI) | p-value |
| Metformin exposure (ref: No) |  |  |  |
| Yes | 1.05 | (0.55-2.02) | 0.886 |
| Rs10506151 (ref: CC) |  |  |  |
| CA+AA | 0.42 | (0.19-0.93) | 0.033 |
| Sex (ref: Female) |  |  |  |
| Male | 1.45 | (0.65-3.25) | 0.364 |
| Age | 1.17 | (1.09-1.25) | <.0001 |
| Education (ref: Elementary school) |  |  |  |
| Junior & Senior High School | 0.70 | (0.32-1.56) | 0.386 |
| University & above | 0.47 | (0.19-1.15) | 0.098 |
| Smoking (ref: No) |  |  |  |
| Yes | 1.33 | (0.58-3.05) | 0.502 |
| Alcohol drink (ref: No) |  |  |  |
| Yes | 0.52 | (0.15-1.83) | 0.310 |
| Physical activity (ref: No) |  |  |  |
| Yes | 0.62 | (0.32-1.20) | 0.156 |
| BMI | 0.95 | (0.86-1.05) | 0.304 |
| Hypertension (ref: No) |  |  |  |
| Yes | 1.18 | (0.57-2.43) | 0.652 |
| Hyperlipidemia (ref: No) |  |  |  |
| Yes | 0.73 | (0.34-1.58) | 0.428 |

Abbreviation: OR = odds ratio, CI = 95% confidence interval
